# Supplementary figures and images for: FDX1 regulates cellular protein lipoylation through direct binding to LIAS
Source: PubMed Central journal article supplement — J Biol Chem. 2023 Jul 13;299(9):105046. doi: 10.1016/j.jbc.2023.105046 (PMC10462841; doi:10.1016/j.jbc.2023.105046), 2023-07-13

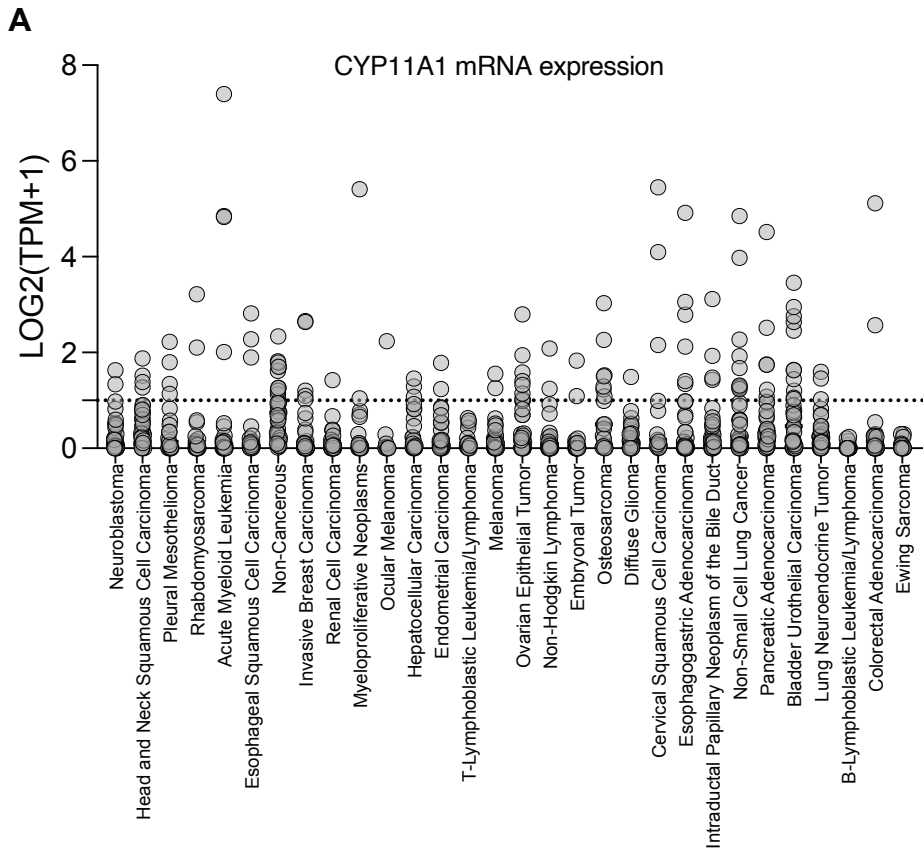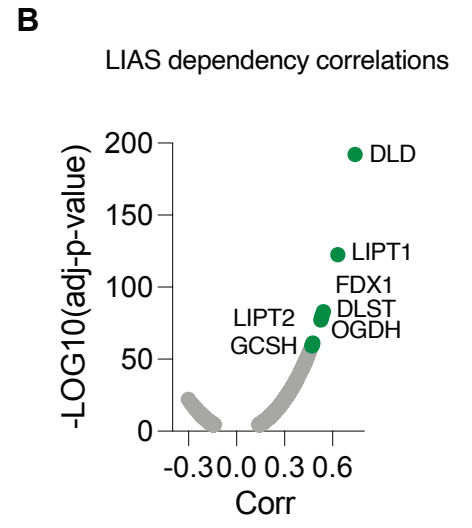

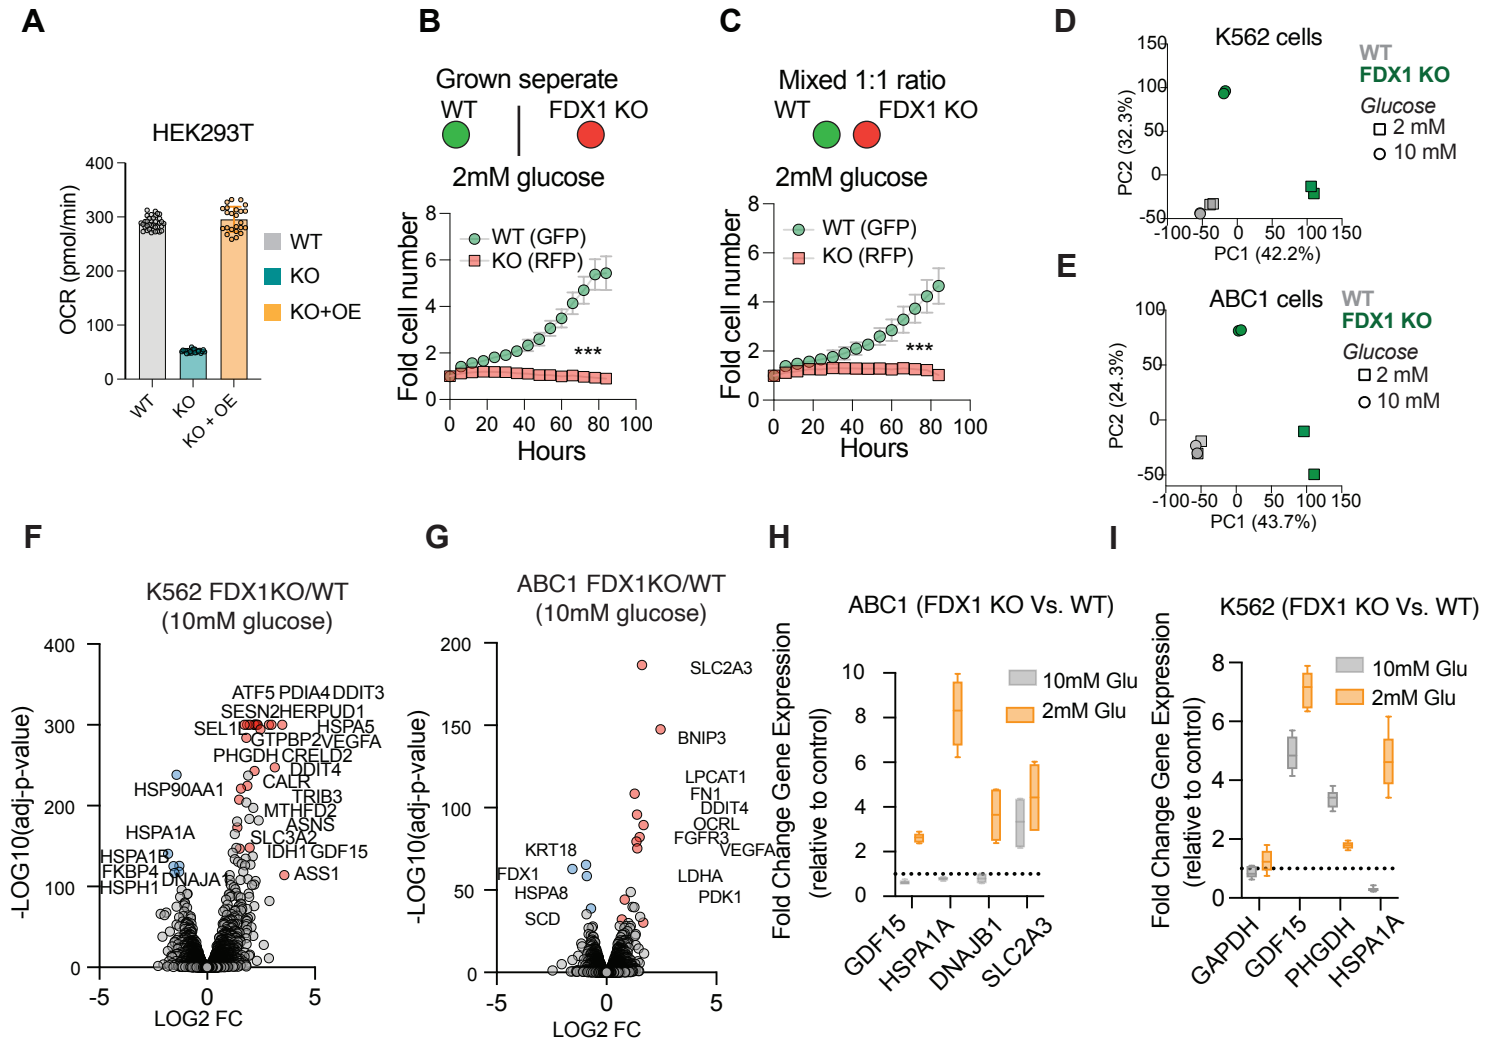

Figure S2

**A**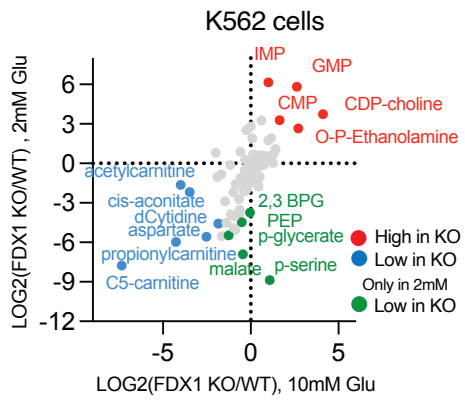**B**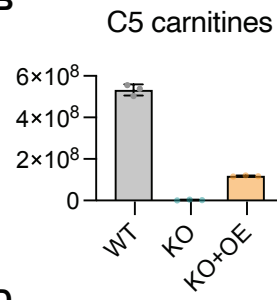**C**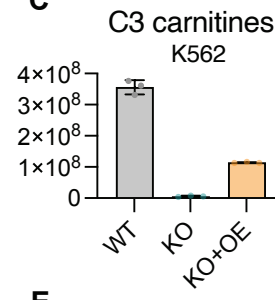**D**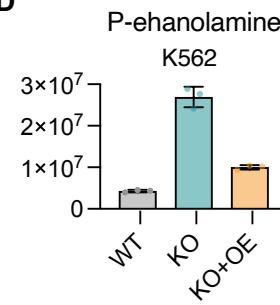**E**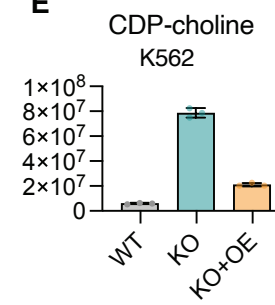**Figure S3**

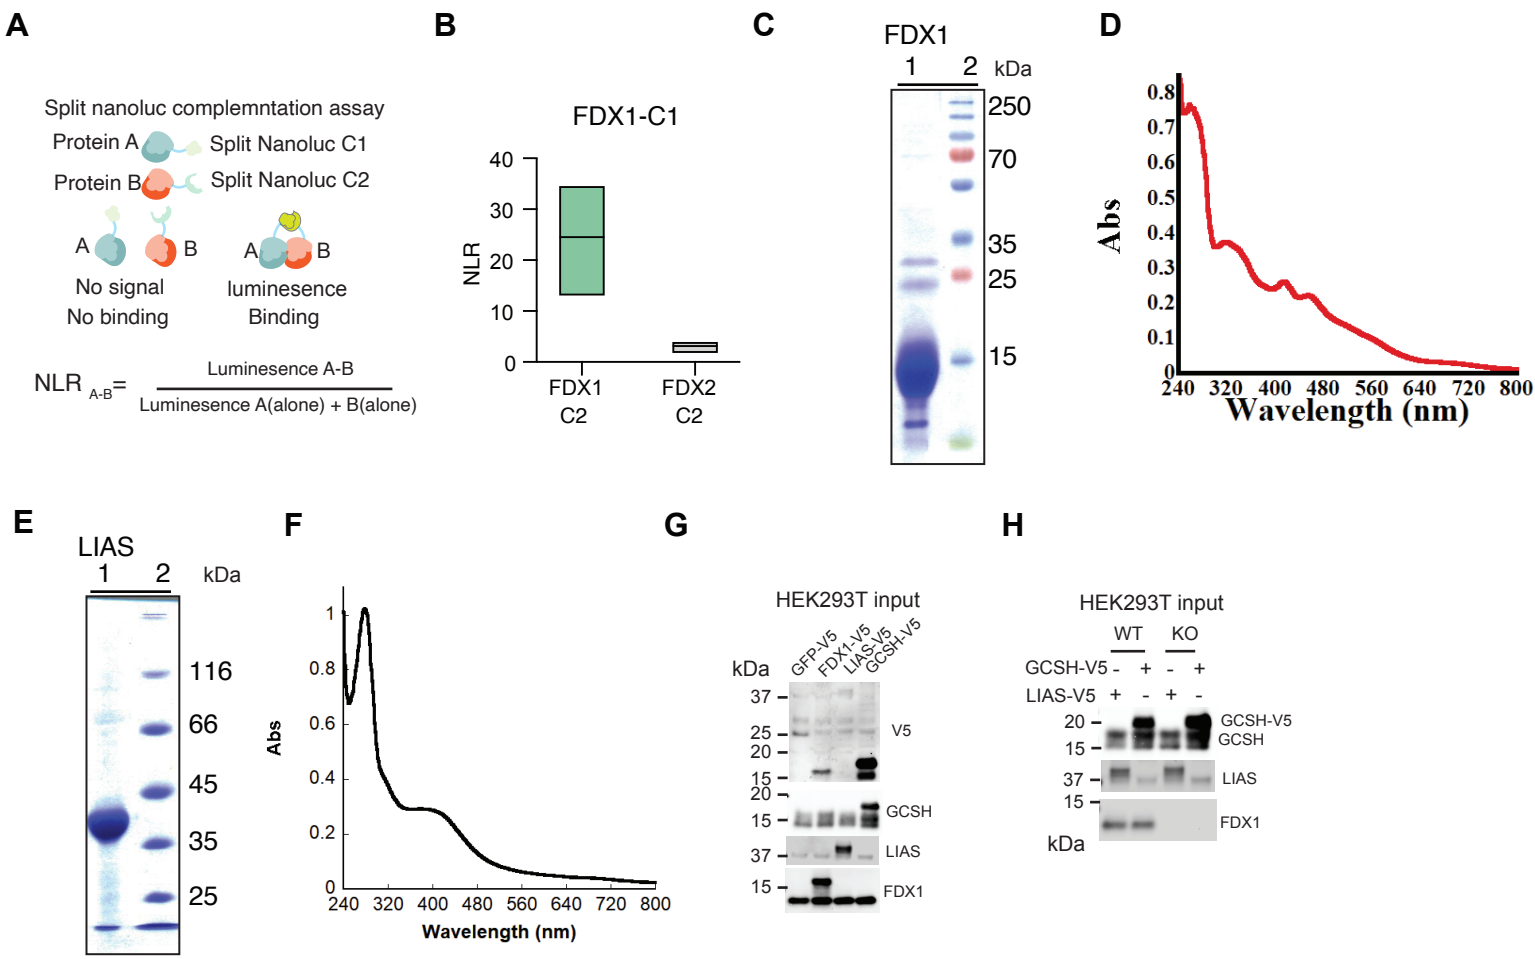

**Figure S4**

Supplement: mmc4.pdf [file mmc4.pdf]
